# Supplementary material for: Myocardial infarction, ST-elevation and non-ST-elevation myocardial infarction and modelled daily pollution concentrations: a case-crossover analysis of MINAP data
Source: PubMed Central journal article supplement (PMC5013456; doi:10.1136/openhrt-2016-000429), 2016-09-01
Supplement: openhrt-2016-000429supp.pdf [file openhrt-2016-000429supp.pdf]

**Supplementary Table 1** Comparing monitored pollutant concentrations 2001-2010 at AURN monitoring sites\* with their corresponding modelled equivalents

| Pollutant <sup>†</sup> | Site Type        | No. of monitoring sites | Average within-site standard deviation |                         | Average within-site covariance<br><i>Cov(mon, mod)</i> | Average within-site correlation<br><i>Corr(mon, mod)</i> | Estimated attenuation in logistic regression coefficient due to CTM measurement error <sup>‡</sup> |
|------------------------|------------------|-------------------------|----------------------------------------|-------------------------|--------------------------------------------------------|----------------------------------------------------------|----------------------------------------------------------------------------------------------------|
|                        |                  |                         | Monitor<br><i>sd(mon)</i>              | Model<br><i>sd(mod)</i> |                                                        |                                                          |                                                                                                    |
| O <sub>3</sub>         | Rural Background | 24                      | 20.334                                 | 19.731                  | 296.075                                                | 0.725                                                    | 24%                                                                                                |
|                        | Urban Background | 63                      | 23.189                                 | 22.071                  | 392.185                                                | 0.758                                                    | 19%                                                                                                |
| NO <sub>2</sub>        | Rural Background | 16                      | 14.110                                 | 17.608                  | 170.796                                                | 0.651                                                    | 45%                                                                                                |
|                        | Urban Background | 75                      | 23.425                                 | 23.343                  | 301.655                                                | 0.542                                                    | 45%                                                                                                |
| PM <sub>10</sub>       | Rural Background | 5                       | 7.764                                  | 12.417                  | 46.531                                                 | 0.469                                                    | 70% <sup>†</sup>                                                                                   |
|                        | Urban Background | 57                      | 10.587                                 | 12.762                  | 67.506                                                 | 0.501                                                    | 59%                                                                                                |
| PM <sub>2.5</sub>      | Rural Background | 3                       | 5.158                                  | 8.437                   | 32.313                                                 | 0.733                                                    | 55% <sup>†</sup>                                                                                   |
|                        | Urban Background | 39                      | 8.618                                  | 6.756                   | 39.696                                                 | 0.686                                                    | 13%                                                                                                |

\*(Source: Automatic Urban and Rural Monitoring Network (AURN) Data Archive. © Crown 2015 copyright Defra via uk-air.defra.gov.uk, licenced under the [Open Government Licence](#) (OGL))

<sup>†</sup>Pollutant metrics: daily mean PM<sub>2.5</sub>, daily mean PM<sub>10</sub>, daily maximum 1-hour NO<sub>2</sub>, daily maximum 8-hour mean O<sub>3</sub>. The monitoring of PM<sub>2.5</sub> only began part-way through the comparison period of 2001-2010. Between 2001 and 2010 there were instrument changes in the monitoring of PM<sub>10</sub>.

<sup>‡</sup>Estimated attenuation =  $\left[1 - \left\{\frac{cov(mon, mod)}{var(mod)}\right\}\right] \times 100\%$  [24] (Measurement error is assumed to be additive).

## Supplementary Figure 1

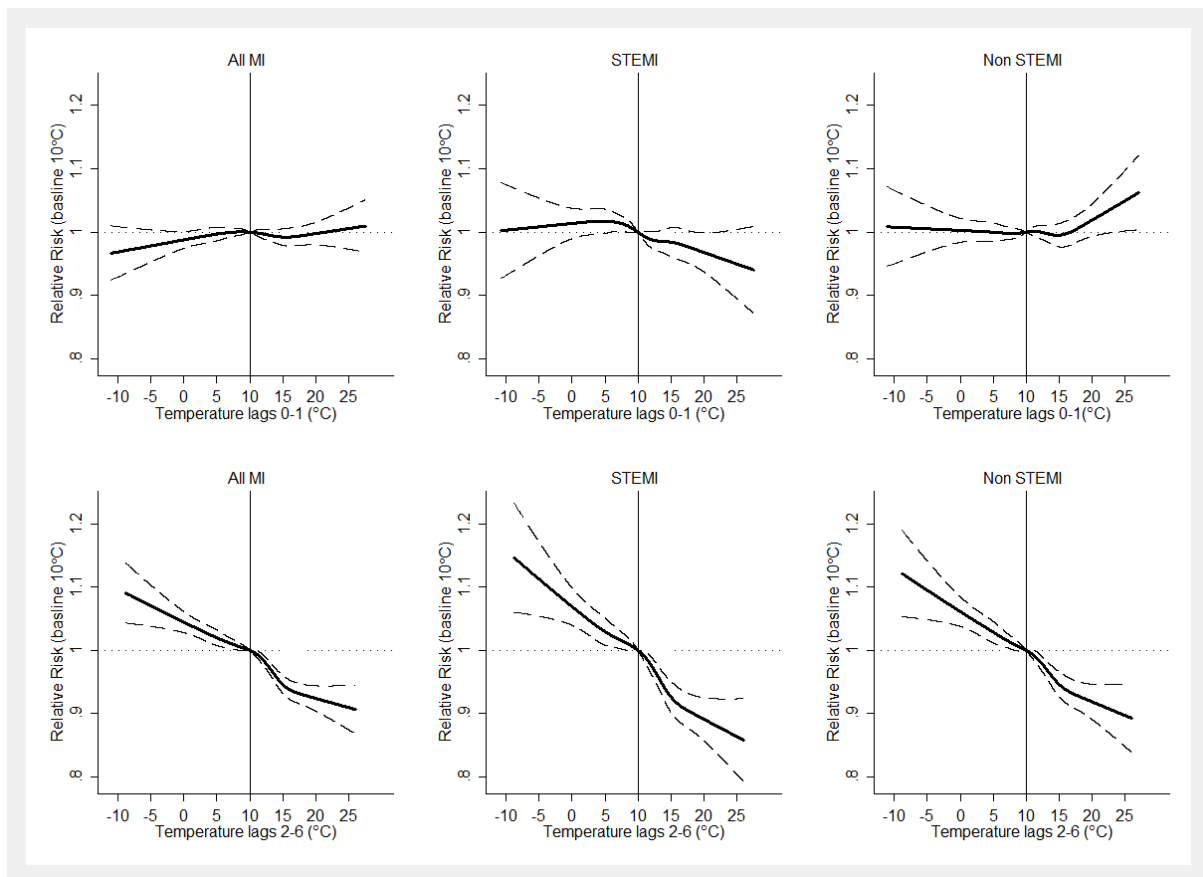

Investigating the associations of myocardial infarction (ALL MI), ST-elevation myocardial infarction (STEMI) and non-ST-elevation myocardial infarction (NSTEMI) with mean daily temperature averaged over lags 0-1 days and over lags 2-6 days.

---

**Supplementary Table 2:** Estimates of the percentage change in risk [95% CI] per 10  $\mu\text{g}/\text{m}^3$  increase in pollutant: Single pollutant models\* (no adjustment for sine cosine annual cycle)

---

| Pollutant <sup>†</sup>                   | All MI<br>% change [95% CI] | STEMI<br>% change [95% CI] | NSTEMI<br>% change [95% CI] |
|------------------------------------------|-----------------------------|----------------------------|-----------------------------|
| <b>Single pollutant regression model</b> |                             |                            |                             |
| O <sub>3</sub>                           | -0.07 [-0.30, 0.16]         | -0.21 [-0.61, 0.19]        | -0.03 [-0.35, 0.29]         |
| NO <sub>2</sub>                          | 0.10 [-0.09, 0.29]          | -0.13 [-0.46, 0.20]        | 0.27 [0.01, 0.54]           |
| PM <sub>2.5</sub>                        | -0.03 [-0.44, 0.38]         | -0.35 [-1.07, 0.38]        | -0.14 [-0.71, 0.44]         |
| PM <sub>10</sub>                         | -0.24 [-0.57, 0.08]         | -0.46 [-1.03, 0.12]        | -0.33 [-0.78, 0.13]         |

---

\*The conditional logistic regression model fits the pollutant(s) as unconstrained distributed lags 0-2 and adjusts for, the weekly RCGP influenza-like illness consultation rates per 100,000 England and Wales population, two natural cubic splines (df=5) for temperature (mean lag 0-1 and mean lag 2-6), public holidays.

<sup>†</sup>Pollutant metrics: daily mean PM<sub>2.5</sub>, daily mean PM<sub>10</sub>, daily maximum 1-hour NO<sub>2</sub>, daily maximum 8-hour mean O<sub>3</sub>.

---
